# Supplementary material for: Assessment of climate-driven variations in malaria incidence in Swaziland: toward malaria elimination
Source: Springer Nature journal article supplement (doi:10.1186/s12936-017-1874-0), 2017-06-01

Additional file 1. Annual malaria incidence (black) and climate variables (red) in Swaziland, 1985-2015

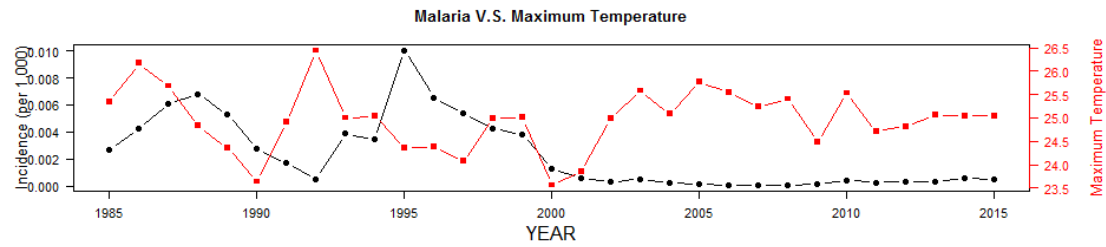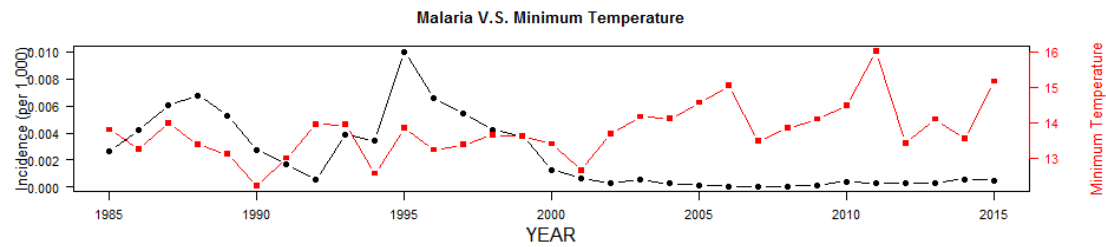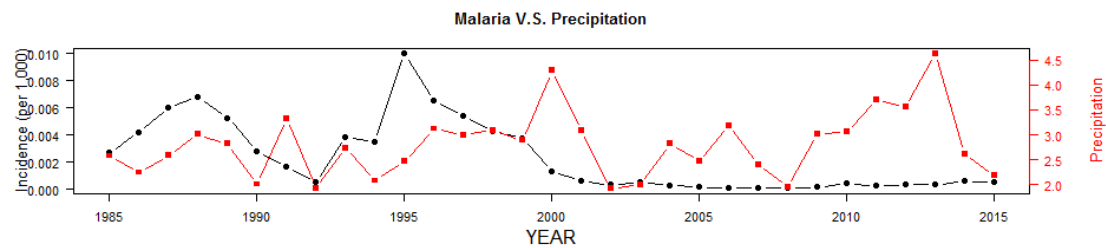

Supplement: MOESM1 [file 12332538]
