# Supplementary material for: Assessment of climate-driven variations in malaria incidence in Swaziland: toward malaria elimination
Source: Springer Nature journal article supplement (doi:10.1186/s12936-017-1874-0), 2017-06-01

Additional file 2. Spatial distributions of imported and locally acquired malaria cases in Swaziland, 2010-2015. The base map was produced by kernel density estimation. (The imported cases mainly clustered in Manzini. The locally acquired cases mainly clustered in Hhohho and Lubombo.)

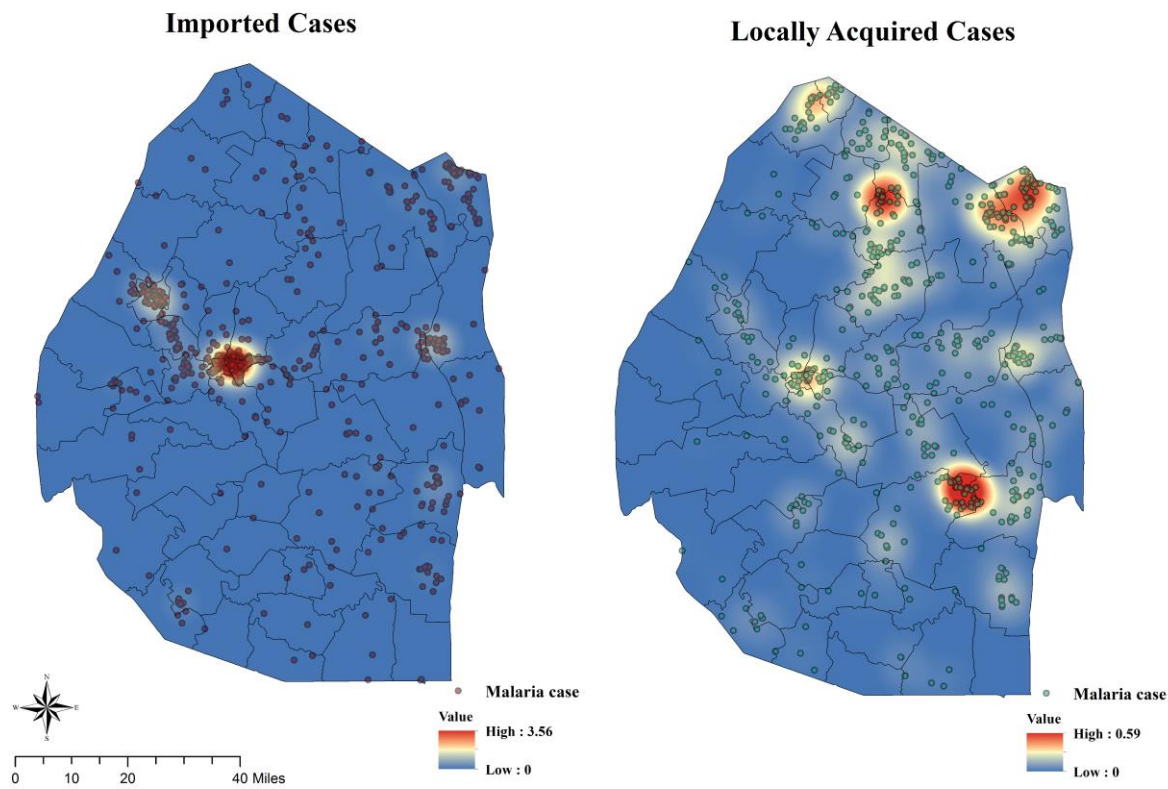

Supplement: MOESM2 [file 12332538]
