# Supplementary material for: Assessment of climate-driven variations in malaria incidence in Swaziland: toward malaria elimination
Source: Springer Nature journal article supplement (doi:10.1186/s12936-017-1874-0), 2017-06-01
Supplement: MOESM3 [file 12332538]

Additional file 3. Correlations of climatic parameters derived from weather stations and satellite remote sensing data

|                  | Hhohho  |           |          | Lubombo |           |          | Manzini |           |          | Shiselweni |           |          |
|------------------|---------|-----------|----------|---------|-----------|----------|---------|-----------|----------|------------|-----------|----------|
|                  | LST Day | LST Night | Rainfall | LST Day | LST Night | Rainfall | LST Day | LST Night | Rainfall | LST Day    | LST Night | Rainfall |
| T_MAX            | 0.72#   | -         | -        | 0.72    | -         | -        | 0.74    | -         | -        | 0.72       | -         | -        |
| T_MIN            | -       | 0.83      | -        | -       | 0.83      | -        | -       | 0.82      | -        | -          | 0.83      | -        |
| PREC             | -       | -         | 0.82     | -       | -         | 0.82     | -       | -         | 0.92     | -          | -         | 0.78     |
| R <sup>2</sup> * | 0.56    | 0.71      | 0.68     | 0.58    | 0.61      | 0.66     | 0.64    | 0.68      | 0.84     | 0.55       | 0.71      | 0.62     |

\*R-squared statistic

#: All the correlation coefficients are statistically significant ( $p < 0.05$ )

[Weather station]

T\_MAX: Maximum Temperature

T\_MIN: Minimum Temperature

PREC: Precipitation

[Remote sensing]

LST Day: Day time land surface temperature from MODIS

LST Night: Night time land surface temperature from MODIS

Rainfall: Precipitation from TRMM
